# Supplementary material
Source: Springer Nature journal article supplement (https://www.springermedizin.de/resource/supplementary/12968_2009_511_MOESM1_ESM.pdf/9579144)

# Adenosine Stress MRI Protocol

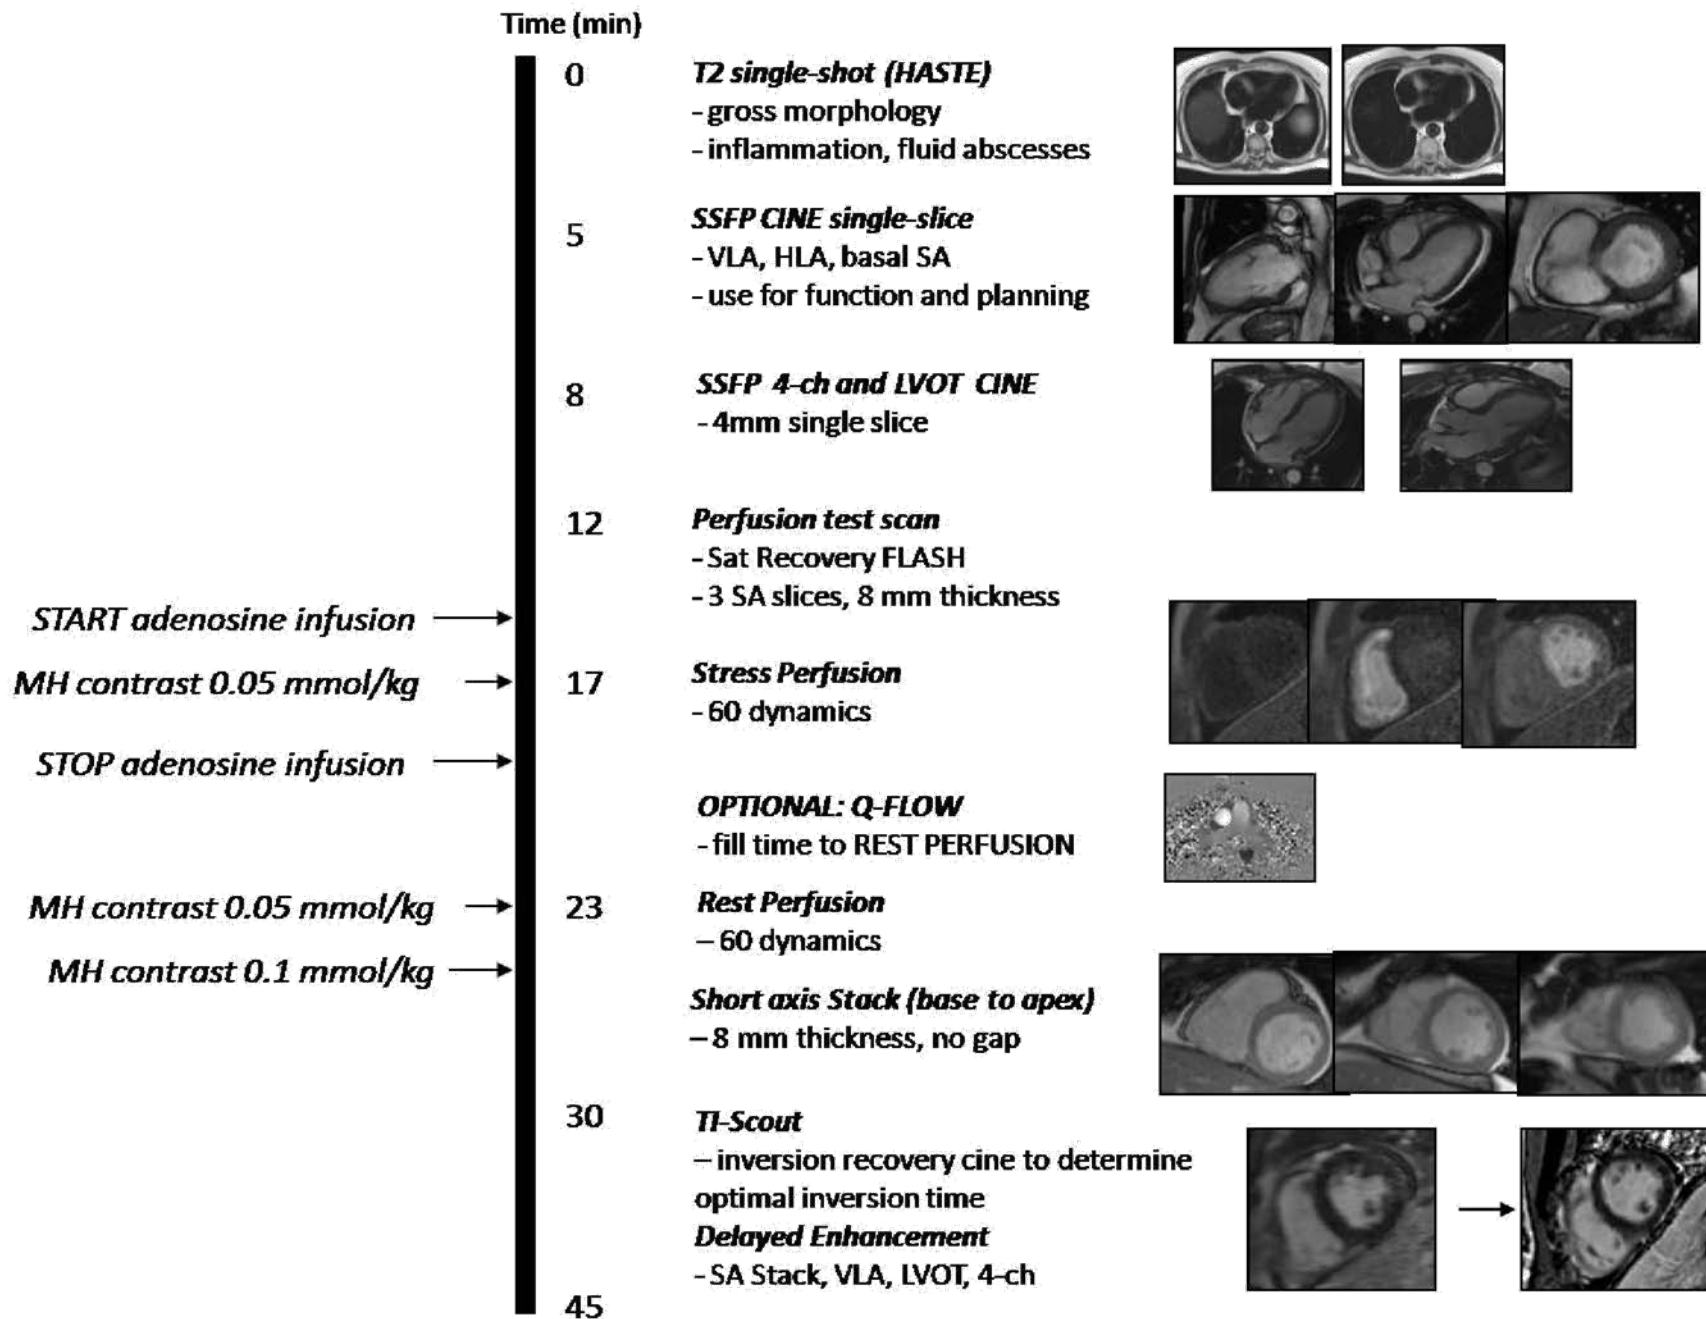

Supplement: MOESM1 [file 9579144]
